# Supplementary material
Source: Elsevier journal article supplement (https://www.sciencedirect.com/science/article/pii/S0213485318301786)
Supplement: mmc1 [file S0213485318301786:mmc1.docx]

**Apéndice**

**Figura. Entorno visual de la aplicación móvil.**

Se muestran las capturas de pantalla para cada test.

1. *Golpeteo básico.* Los participantes presionaban en un círculo de 15mm de diámetro que aleatoriamente aparecía en la pantalla.

2. *Golpeteo secuencial.* Se pidió a los pacientes que presionaran la tecla de un teclado virtual de los números que aparecían en pantalla.

3. *Doble tapping.* Los participantes tenían que apagar una alarma por medio de dos golpes de dedo en un círculo de 15mm.

4. *Tarea de desbloqueo/arrastre.* Los participantes tenían que apagar una alarma, tocando un círculo de 15mm y arrastrándolo a lo largo de la pantalla hasta un objetivo.


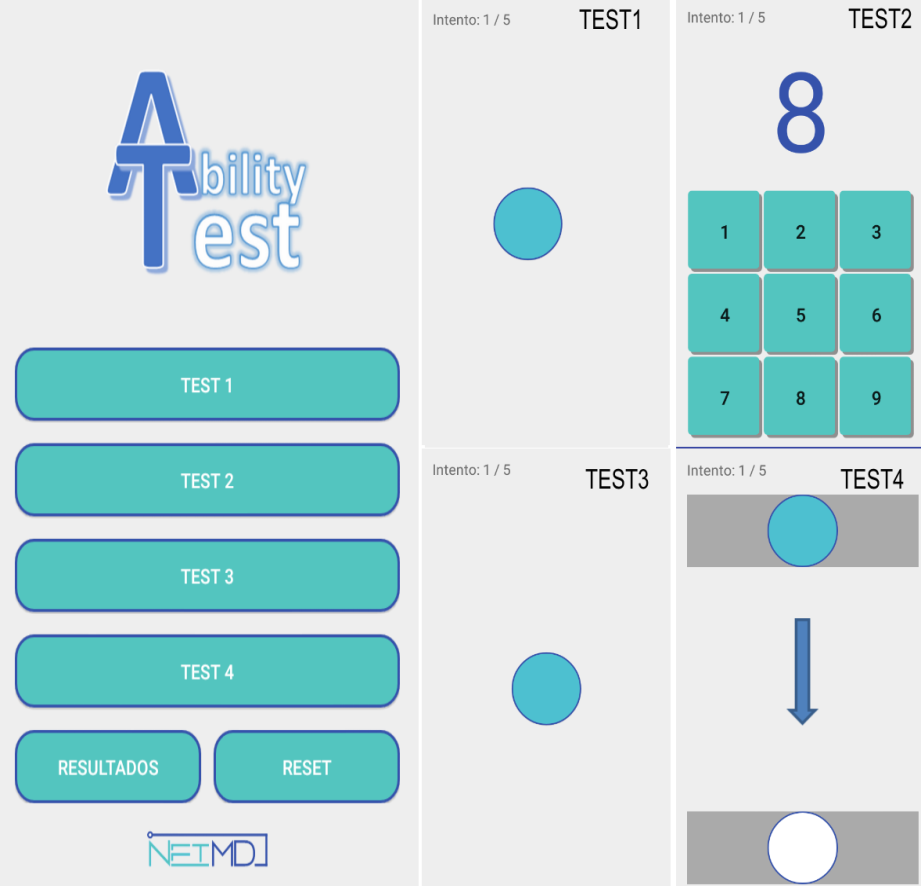


**Datos clínicos de los pacientes**

| **Id** | **Sex** | **Age** | **Duration of tremor (years)** | **Total**  **FTM-TRS Score** | **FTM-TRS A** | **FTM-TRS B** | **Treatment** |
| --- | --- | --- | --- | --- | --- | --- | --- |
| 1 | Male | 67 | 5.73 | 27 | 12 | 11 | None |
| 2 | Female | 69 | 29.75 | 17 | 6 | 6 | None |
| 3 | Male | 68 | 12.73 | 35 | 15 | 15 | Primidone, Propranolol |
| 4 | Male | 73 | 20.74 | 20 | 7 | 10 | Zonisamide |
| 5 | Male | 73 | 10.76 | 37 | 11 | 18 | None |
| 6 | Male | 43 | 19.78 | 22 | 9 | 8 | Primidone, Gabapentine |
| 7 | Male | 62 | 4.75 | 21 | 4 | 10 | None |
| 8 | Male | 77 | 9.83 | 47 | 19 | 19 | Primidone, Propranolol |
| 9 | Male | 73 | 4.79 | 29 | 9 | 15 | Propranolol, Zonisamide |
| 10 | Female | 82 | 3.79 | 45 | 13 | 21 | Primidone |
| 11 | Female | 78 | 5.81 | 24 | 5 | 14 | Primidone |
| 12 | Male | 51 | 3.83 | 16 | 2 | 8 | None |
| 13 | Female | 50 | 6.84 | 10 | 2 | 5 | None |
| 14 | Female | 55 | 4.84 | 10 | 3 | 5 | None |
| 15 | Female | 59 | 7.85 | 19 | 5 | 10 | None |
| 16 | Male | 68 | 7.85 | 39 | 13 | 16 | Propranolol |
| 17 | Female | 77 | 8.87 | 45 | 18 | 22 | Propranolol |
| 18 | Female | 80 | 35.89 | 38 | 12 | 16 | Propranolol |
| 19 | Male | 71 | 4.87 | 31 | 13 | 14 | None |
| 20 | Male | 78 | 27.90 | 44 | 14 | 26 | Primidone |
| 21 | Male | 76 | 14.93 | 60 | 21 | 27 | None |
| 22 | Female | 46 | 2.94 | 13 | 5 | 5 | Propranolol |
| 23 | Female | 61 | 46.06 | 38 | 11 | 21 | Propranolol |
| 24 | Female | 51 | 16.06 | 14 | 4 | 7 | None |
| 25 | Male | 69 | 9.06 | 28 | 12 | 13 | None |
| 26 | Male | 70 | 5.42 | 22 | 6 | 13 | None |
| 27 | Male | 19 | 10.29 | 21 | 5 | 13 | None |
| 28 | Male | 73 | 7.31 | 35 | 8 | 20 | Primidone |
| 29 | Male | 68 | 26.33 | 22 | 8 | 12 | Primidone |
| 30 | Male | 51 | 5.10 | 13 | 9 | 4 | None |
| 31 | Female | 59 | 18.20 | 8 | 4 | 3 | None |

Please, note severity of tremor was mild to moderate ranging 0-60 points (Total range = 0 – 144), in view of severity tremor rating scale score (FTM-TRS Score).
